# Supplementary material for: Vitamin B Complex and Experimental Autoimmune Encephalomyelitis –Attenuation of the Clinical Signs and Gut Microbiota Dysbiosis
Source: MDPI journal article supplement (doi:10.3390/nu14061273), 2022-03-17
Supplement: s1 [file s1]

## Vitamin B complex and experimental autoimmune encephalomyelitis – Attenuation of the clinical signs and gut microbiota dysbiosis

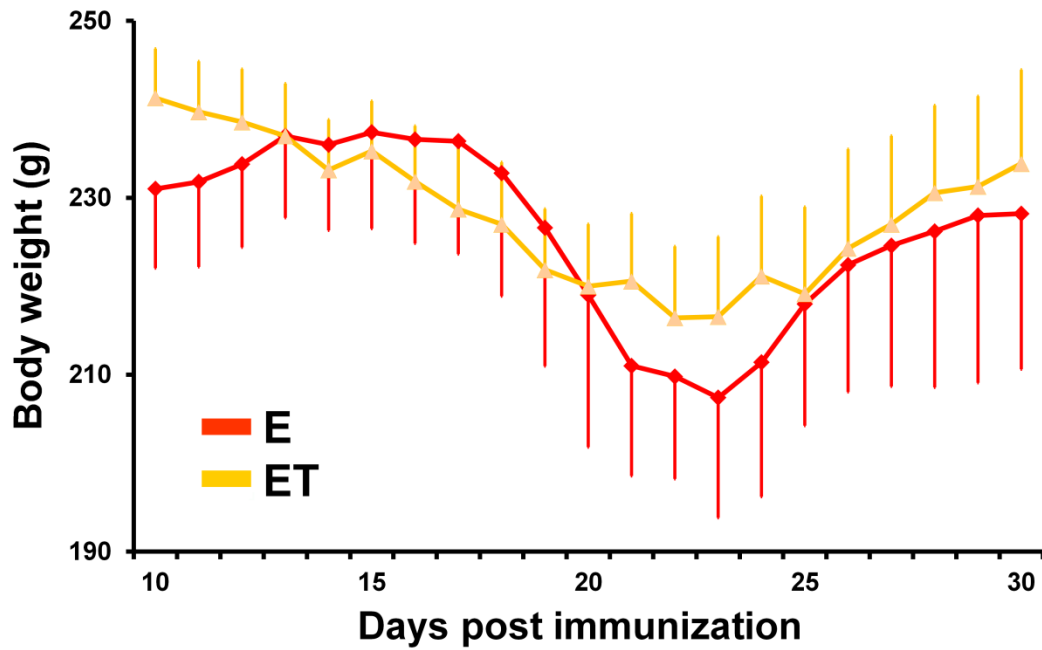

**Figure S1.** Body weight of untreated (E) and VBC-treated (ET) EAE rats during the disease course. Results are presented as mean  $\pm$  SE.

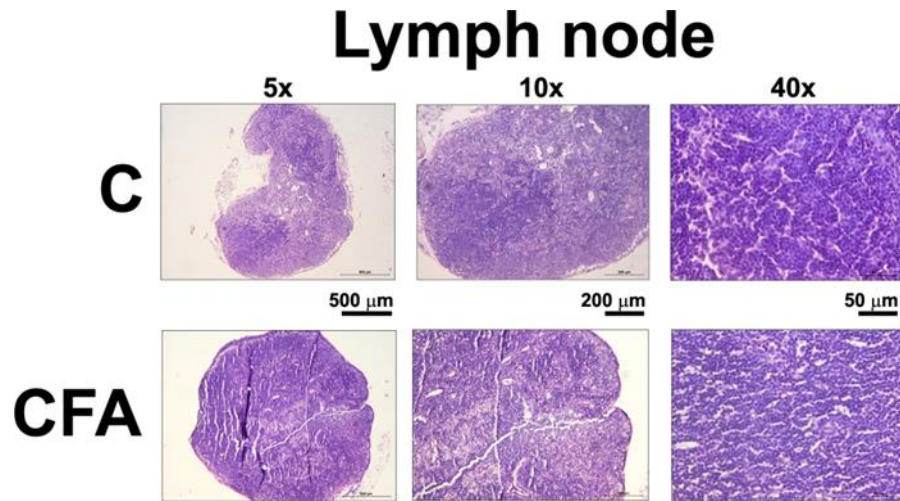

**Figure S2.** Histological examinations of the popliteal lymph node sections of C and CFA control groups. Micrographs of transverse sections of H&E stained lymph nodes. Magnification 5x (scale bar 500  $\mu$ m), 10x (scale bar 200  $\mu$ m), and 40x (scale bar 50  $\mu$ m).

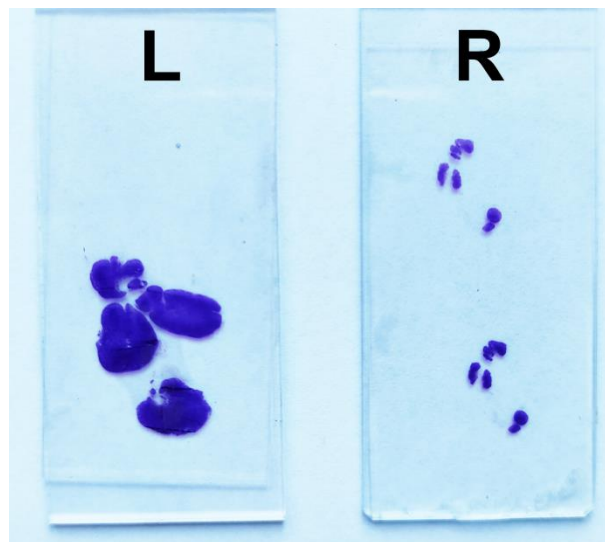

**Figure S3.** Difference between the size/extent of left (L) popliteal lymph node in comparison with right (R) after EAE induction.

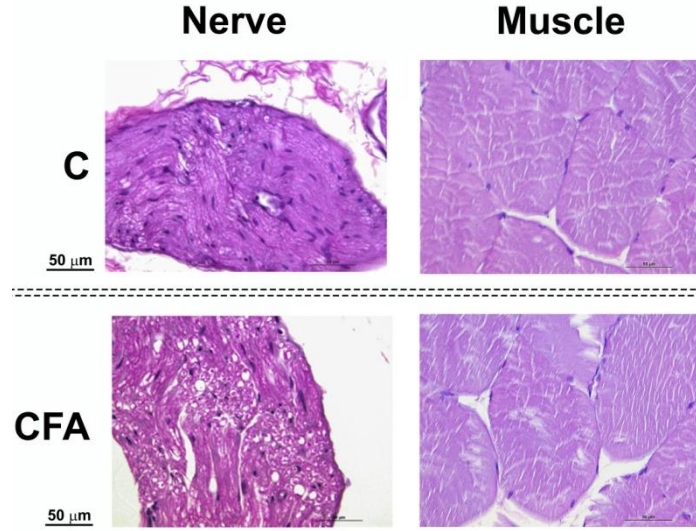

**Figure S4.** Histological examinations of nerve and muscle nuclear density of C and CFA control groups. Magnification 40x (scale bar 50  $\mu\text{m}$ ).

**Table S1.** Beta diversity calculated as weighted Unifrac distance between the samples.

|     | C        | CFA      | Eo       | Ep       | Ee       | ETo      | ETp      | ETe      |
|-----|----------|----------|----------|----------|----------|----------|----------|----------|
| C   | 0        | 0.173535 | 0.284747 | 0.284667 | 0.19407  | 0.326013 | 0.246003 | 0.159983 |
| CFA | 0.173535 | 0        | 0.186428 | 0.1637   | 0.164375 | 0.225354 | 0.163207 | 0.10299  |
| Eo  | 0.284747 | 0.186428 | 0        | 0.14472  | 0.18184  | 0.202293 | 0.160026 | 0.187298 |
| Ep  | 0.284667 | 0.1637   | 0.14472  | 0        | 0.211488 | 0.167999 | 0.150631 | 0.187482 |
| Ee  | 0.19407  | 0.164375 | 0.18184  | 0.211488 | 0        | 0.209439 | 0.189718 | 0.115997 |
| ETo | 0.326013 | 0.225354 | 0.202293 | 0.167999 | 0.209439 | 0        | 0.199031 | 0.210075 |
| ETp | 0.246003 | 0.163207 | 0.160026 | 0.150631 | 0.189718 | 0.199031 | 0        | 0.135509 |
| ETe | 0.159983 | 0.10299  | 0.187298 | 0.187482 | 0.115997 | 0.210075 | 0.135509 | 0        |

**Table S2.** Relative abundance of genera within Prevotellaceae family in different samples. Letters a-k indicate pairs of samples that were detected as differentially abundant according to the differentially abundant test based on metastat method as implemented in microeco package.

| Genus/Groups                       | C                           | Eo                    | Ep                  | Ee                 | Eaverage | ETo                 | ETp                   | ETe                 | ETaverage |
|------------------------------------|-----------------------------|-----------------------|---------------------|--------------------|----------|---------------------|-----------------------|---------------------|-----------|
| <b>Prevotellaceae NK3B31 group</b> | 0.2125 <sup>a,b,c,d,e</sup> | 0.0081 <sup>a</sup>   | 0.0088 <sup>b</sup> | 0.1476             | 0.1476   | 0.0084 <sup>c</sup> | 0.0096 <sup>d</sup>   | 0.0843 <sup>e</sup> | 0.0341    |
| <b>Prevotella_9</b>                | 0.1415 <sup>f,g,h</sup>     | 0.0855                | 0.0305 <sup>f</sup> | 0.055 <sup>g</sup> | 0.0570   | 0.0400 <sup>h</sup> | 0.0688                | 0.0960              | 0.0683    |
| <b>Prevotellaceae UCG-001</b>      | 0.0682                      | 0.0226                | 0.0184              | 0.0527             | 0.0312   | 0.0240              | 0.0313                | 0.0500              | 0.0351    |
| <b>Prevotellaceae UCG-003</b>      | 0.0456 <sup>i</sup>         | 0.0305                | 0.0261 <sup>i</sup> | 0.0261             | 0.0276   | 0.0261              | 0.1429 <sup>e,h</sup> | 0.0514              | 0.0735    |
| <b>Alloprevotella</b>              | 0.0335 <sup>i</sup>         | 0.0654 <sup>j,k</sup> | 0.0292              | 0.0232             | 0.0393   | 0.0125              | 0.0464                | 0.0449 <sup>k</sup> | 0.0346    |
| <b>Prevotella</b>                  | 0.0199                      | 0.0085                | 0.0034              | 0.0075             | 0.0065   | 0.0074              | 0.0116                | 0.0109              | 0.0100    |
| <b>f_Prevotellaceae_g_NA</b>       | 0.0108                      | 0.0055                | 0.0081              | 0.0078             | 0.0071   | 0.0070              | 0.0098                | 0.0100              | 0.0089    |
| <b>Prevotellaceae Ga6A1 group</b>  | 0.0017                      | 0.0025                | 0.0062              | 0.0053             | 0.0047   | 0.0023              | 0.0052                | 0.0015              | 0.0030    |
